# Supplementary material for: Prevalence of Mycobacterium lentiflavum in cystic fibrosis patients, France
Source: Springer Nature journal article supplement (doi:10.1186/s12890-015-0123-y), 2015-10-26
Supplement: MOESM1 [file 9751952]

Additional table. *Mycobacterium* species tested for the specificity/sensitivity assay of real-time PCR for *Mycobacterium lentiflavum* species.

| <i>Mycobacterium</i> species                                                                           | Number of isolates used | Real-time PCR positive |
|--------------------------------------------------------------------------------------------------------|-------------------------|------------------------|
| <i>Mycobacterium abscessus</i> subsp. <i>abscessus</i>                                                 | 1                       | 0                      |
| <i>Mycobacterium abscessus</i> subsp. <i>bolletii</i>                                                  | 1                       | 0                      |
| <i>Mycobacterium avium</i>                                                                             | 3                       | 0                      |
| <i>Mycobacterium avium</i> subsp. <i>hominissuis</i>                                                   | 1                       | 0                      |
| <i>Mycobacterium bovis</i> Bacille Calmette–Guerin strain                                              | 1                       | 0                      |
| Tokyo                                                                                                  |                         |                        |
| <i>Mycobacterium chelonae</i>                                                                          | 2                       | 0                      |
| <i>Mycobacterium chimaera</i>                                                                          | 1                       | 0                      |
| <i>Mycobacterium europaeum</i>                                                                         | 2                       | 0                      |
| <i>Mycobacterium fortuitum</i>                                                                         | 1                       | 0                      |
| <i>Mycobacterium gordonae</i>                                                                          | 1                       | 0                      |
| <i>Mycobacterium intracellulare</i>                                                                    | 1                       | 0                      |
| <i>Mycobacterium kansasii</i>                                                                          | 2                       | 0                      |
| <i>Mycobacterium lentiflavum</i> (including 6 <i>M. lentiflavum</i> isolates reported in this article) | 9                       | 9                      |
| <i>Mycobacterium porcinum</i>                                                                          | 1                       | 0                      |
| <i>Mycobacterium simiae</i>                                                                            | 2                       | 0                      |
| <i>Mycobacterium xenopi</i>                                                                            | 1                       | 0                      |
| TOTAL                                                                                                  | 30                      | 9                      |
