# Supplementary material for: Prevalence of Mycobacterium lentiflavum in cystic fibrosis patients, France
Source: Springer Nature journal article supplement (doi:10.1186/s12890-015-0123-y), 2015-10-26
Supplement: MOESM2 [file 9751952]

17-year old male patient

Lung transplantation

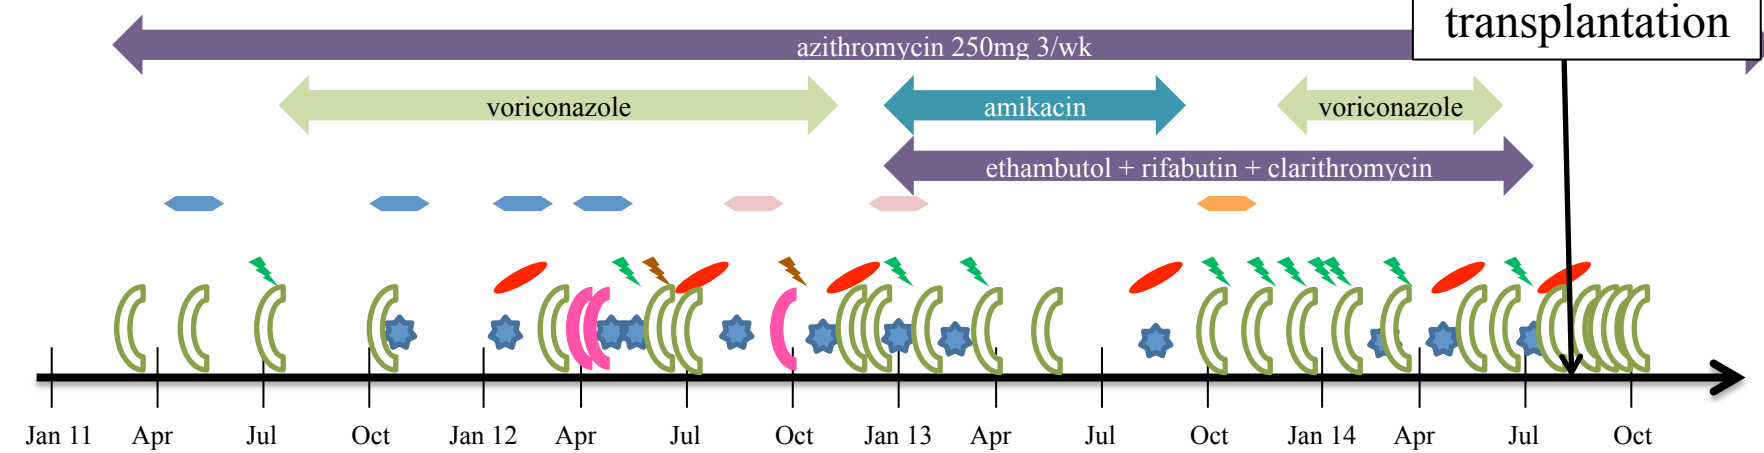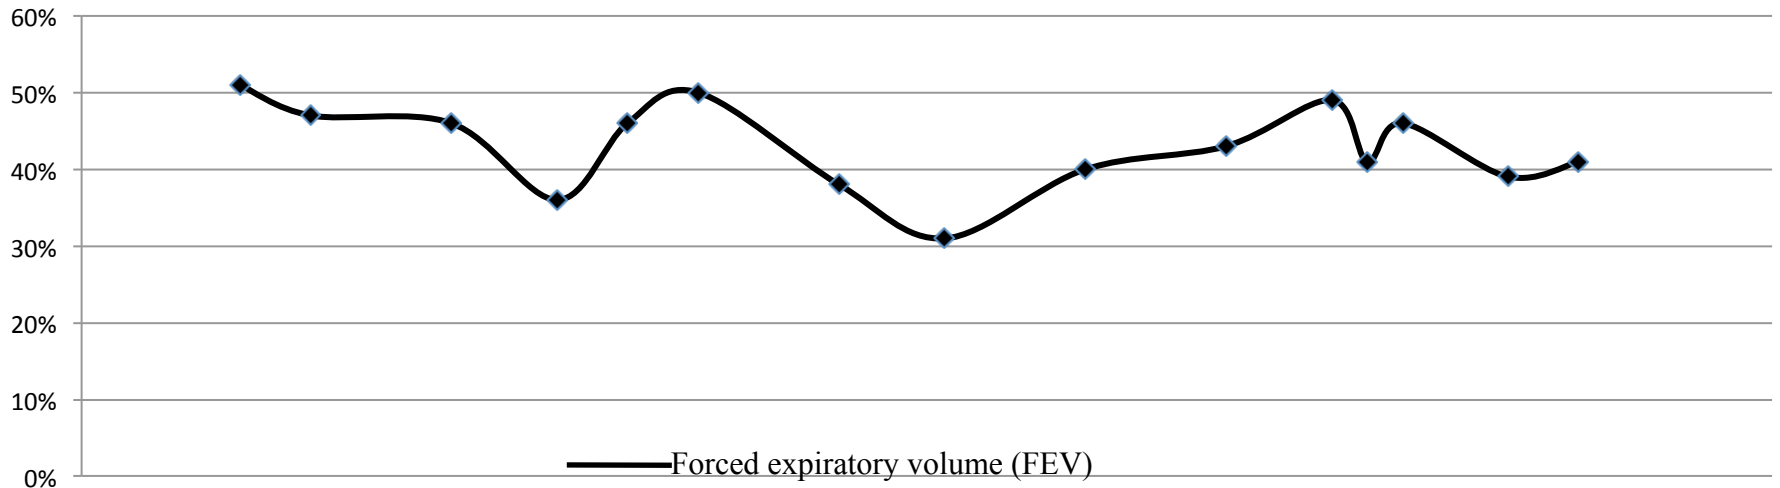

- Methicillin susceptible *Staphylococcus aureus*
- Mycobacterium lentiflavum* isolation**
- Negative culture for mycobacteria
- ceftazidime + tobramycin 15d
- ceftazidime + trimethoprim/sulfamethoxazole (+ciprofloxacin in Sep 2012) 15d
- meropenem
- Scedosporium apiospermum*
- Aspergillus fumigatus*
- Gram negative bacilli : *Achromobacter* sp., *Pseudomonas* sp., *Serratia* sp., *Stenotrophomonas* sp.

36-year old male patient

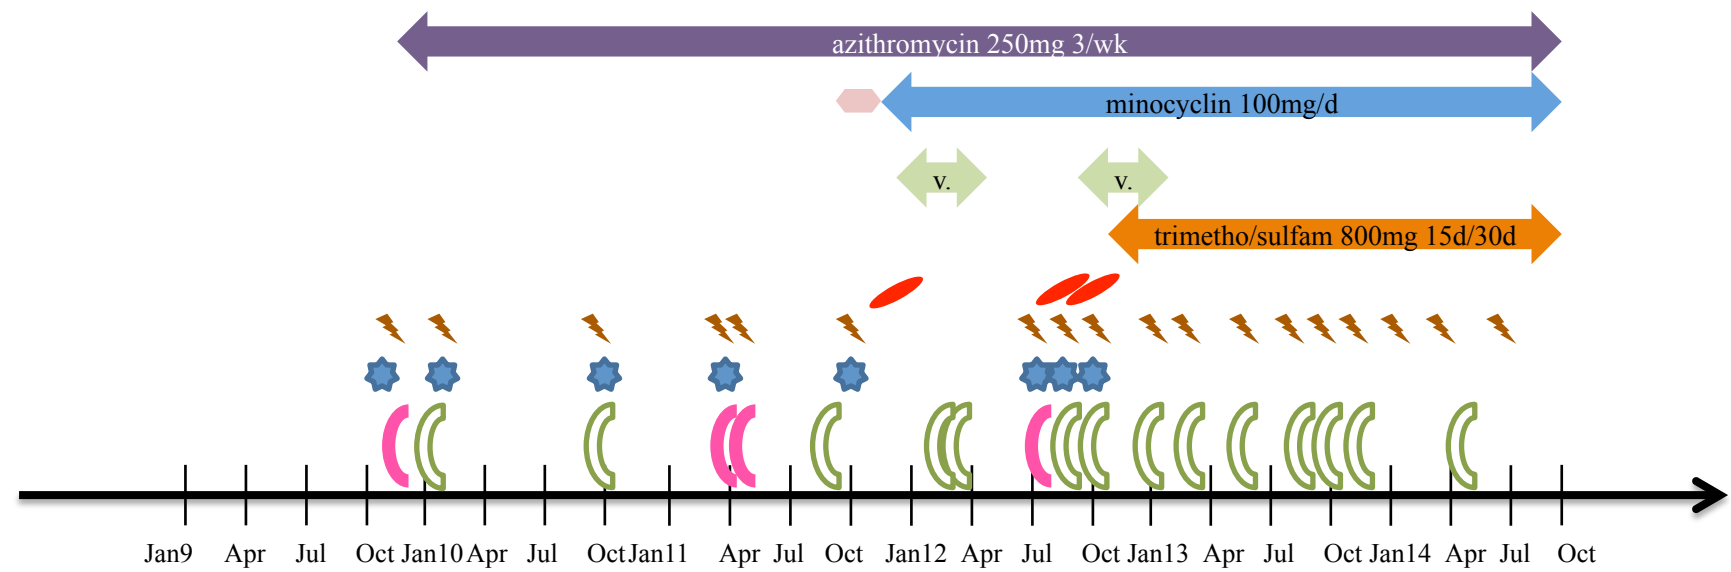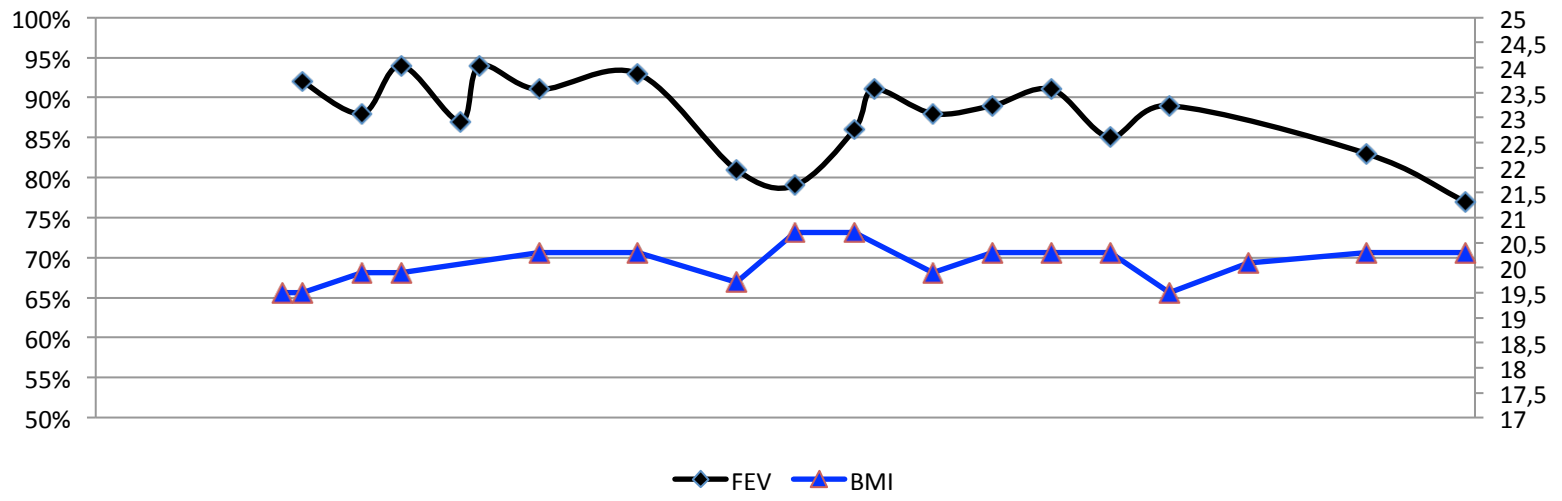

 Amoxicillin/clavulanate 15d then oxacillin 15d + ciprofloxacin 1mo  
 Voriconazole 200mg/d
